# Supplementary material for: Acetylation at Lysine 86 of Escherichia coli HUβ Modulates the DNA-Binding Capability of the Protein
Source: PubMed Central journal article supplement (PMC8854993; doi:10.3389/fmicb.2021.809030), 2022-02-04
Supplement: Data_Sheet_1.pdf [file Data_Sheet_1.pdf]

## Supplementary Material

### 1 Supplementary Data

#### 1.1 DNA sequences used in EMSA.

Sticky ends (single stranded DNA) are annotated in red.

5500 bp DNA sequence - pCX sfGFP(150TAA) linearised with HindIII digestion:

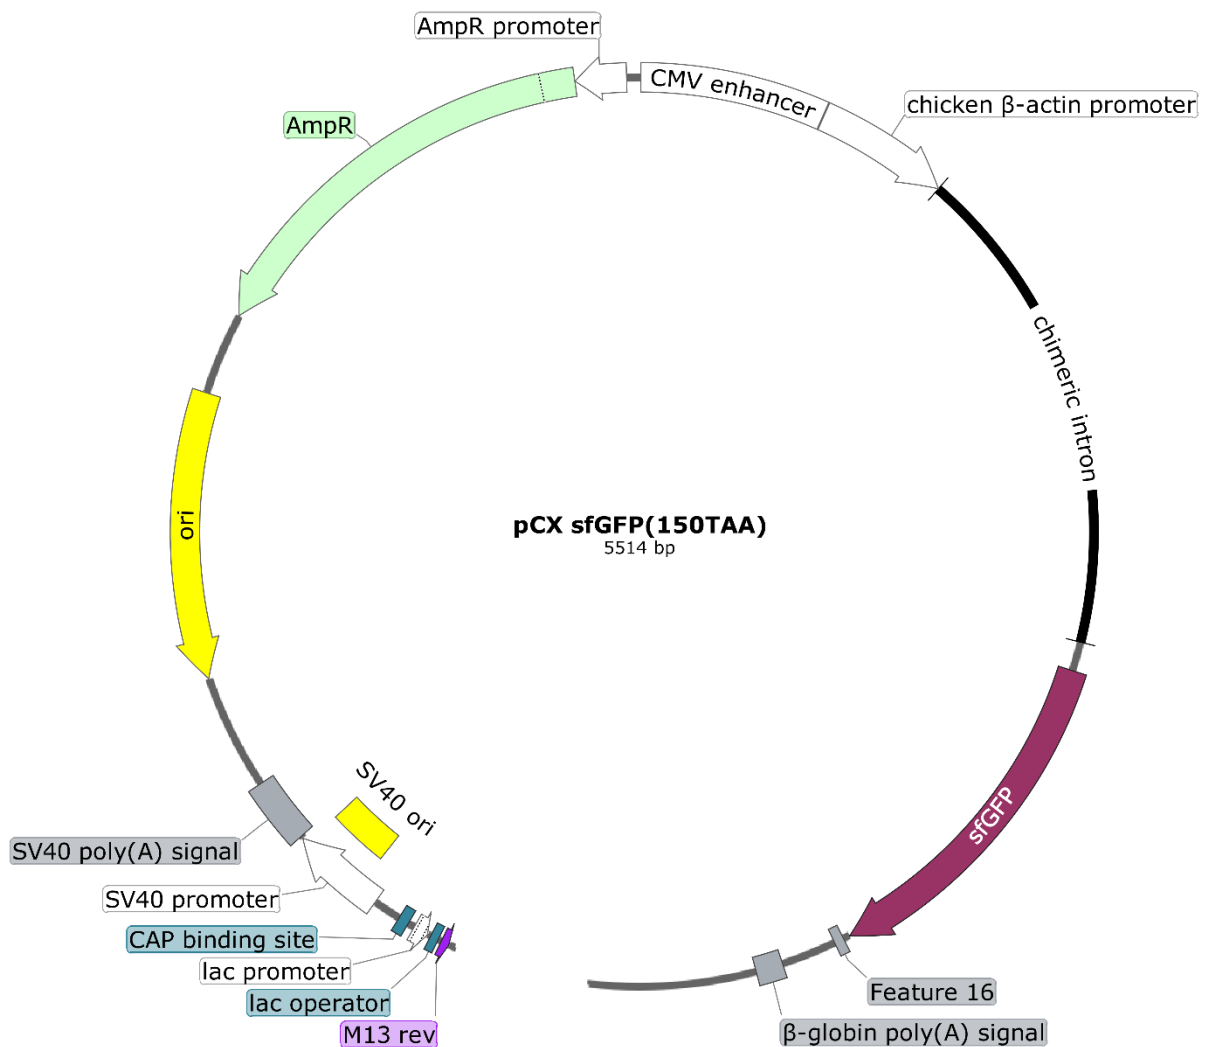

AGCTTGGCGTAATCATGGTCATAGCTGTTTCCTGTGTGAAATTGTTATCCGCTCACAATT  
 CCACACAACATACGAGCCGGAAGCATAAAGTGTAAGCCTGGGGTGCCTAATGAGTGA  
 GCTAACTCACATTAATTGCGTTGCGCTCACTGCCCGCTTCCAGTCGGGAAACCTGTCGT  
 GCCAGCGGATCCGCATCTCAATTAGTCAGCAACCATAGTCCCGCCCCCTAACTCCGCCCAT  
 CCCGCCCTAACTCCGCCAGTTCGCCCATCTCCGCCCATGGCTGACTAATTTTTTTT

ATTTATGCAGAGGCCGAGGCCGCCTCGGCCTCTGAGCTATTCCAGAAGTAGTGAGGAGG  
CTTTTTTGGAGGCCTAGGCTTTTGCAAAAAGCTAACTTGTTTATTGCAGCTTATAATGGT  
TACAAATAAAGCAATAGCATCACAAATTTACAAATAAAGCATTTTTTTTCACTGCATTCT  
AGTTGTGGTTTTGTCCAACTCATCAATGTATCTTATCATGTCTGGATCCGCTGCATTAAT  
GAATCGGCCAACGCGCGGGGAGAGGCGGTTTGCCTATTGGGCGCTCTTCCGCTTCCTCG  
CTCACTGACTCGCTGCGCTCGGTCGTTCCGGCTGCGGCGAGCGGTATCAGCTCACTCAA  
GGCGGTAATACGGTTATCCACAGAATCAGGGGATAACGCAGGAAAGAACATGTGAGCA  
AAAGGCCAGCAAAAGGCCAGGAACCGTAAAAAGGCCGCGTTGCTGGCGTTTTTCCATAG  
GCTCCGCCCCCTGACGAGCATCACAAAATCGACGCTCAAGTCAGAGGTGGCGAAACC  
CGACAGGACTATAAAGATAACCAGGCGTTTTCCCCCTGGAAGCTCCCTCGTGCGCTCTCCTG  
TTCCGACCCTGCCGCTTACCGGATACCTGTCCGCCTTTCTCCCTTCGGGAAGCGTGGCGC  
TTTCTCAATGCTCACGCTGTAGGTATCTCAGTTCGGTGTAGGTCGTTTCGCTCCAAGCTGG  
GCTGTGTGCACGAACCCCCGTTACAGCCGACCGCTGCGCCTTATCCGGTAACTATCGTC  
TTGAGTCCAACCCGGTAAGACACGACTTATCGCCACTGGCAGCAGCCACTGGTAACAGG  
ATTAGCAGAGCGAGGTATGTAGGCGGTGCTACAGAGTTCTTGAAGTGGTGGCCTAACTA  
CGGCTACACTAGAAGGACAGTATTTGGTATCTGCGCTCTGCTGAAGCCAGTTACCTTCGG  
AAAAAGAGTTGGTAGCTCTTGATCCGGCAAACAAACCACCGCTGGTAGCGGTGGTTTTT  
TTGTTTGCAAGCAGCAGATTACGCGCAGAAAAAAGGATCTCAAGAAGATCCTTTGATC  
TTTTCTACGGGGTCTGACGCTCAGTGGAACGAAAACCTCACGTTAAGGGATTTTGGTCATG  
AGATTATCAAAAAGGATCTTCACCTAGATCCTTTTAAATTA AAAATGAAGTTTTAAATCA  
ATCTAAAGTATATATGAGTAACTTGGTCTGACAGTTACCAATGCTTAATCAGTGAGGC  
ACCTATCTCAGCGATCTGTCTATTTTCGTTTCATCCATAGTTGCCTGACTCCCCGTCGTGTAG  
ATAACTACGATACGGGAGGGCTTACCATCTGGCCCCAGTGCTGCAATGATACCGCGAGA  
CCCACGCTCACCGGCTCCAGATTTATCAGCAATAAACCAGCCAGCCGGAAGGGCCGAGC  
GCAGAAGTGGTCCTGCAACTTTATCCGCCTCCATCCAGTCTATTAATTGTTGCCGGGAAG  
CTAGAGTAAGTAGTTCGCCAGTTAATAGTTTGCGCAACGTTGTTGCCATTGCTACAGGCA  
TCGTGGTGTACGCTCGTTCGTTTGGTATGGCTTCATTCAGCTCCGGTTCCCAACGATCAA  
GGCGAGTTACATGATCCCCCATGTTGTGCAAAAAGCGGTTAGCTCCTTCGGTCTCCTCGA  
TCGTTGTCAGAAGTAAGTTGGCCGCAAGTGTATCACTCATGGTTATGGCAGCACTGCATA  
ATTCTCTTACTGTCATGCCATCCGTAAGATGCTTTTTCTGTGACTGGTGAGTACTCAACCA  
AGTCATTCTGAGAATAGTGTATGCGGGCAGCGAGTTGCTCTTGCCCGGCGTCAATACGG  
GATAATACCGCGCCACATAGCAGAACTTTAAAAGTGCTCATCATTGGAAAACGTTCTTC  
GGGGCGAAAACCTCTCAAGGATCTTACCGCTGTTGAGATCCAGTTCGATGTAACCCACTC  
GTGCACCCAACCTGATCTTCAGCATCTTTACTTTTACCAGCGTTTCTGGGTGAGCAAAA  
CAGGAAGGCCAAAATGCCGCAAAAAGGGAATAAGGGCGACACGGAAATGTTGAATACT  
CATACTCTTCCTTTTTCAATATTATTGAAGCATTATCAGGGTTATTGTCTCATGAGCGGA  
TACATATTTGAATGTATTTAGAAAAATAAACAAATAGGGGTTCCGCGCACATTTCCCCG  
AAAAGTGCCACCTGGTTCGACATTGATTATTGACTAGTTATTAATAGTAATCAATTACGGG  
GTCATTAGTTCATAGCCCATATATGGAGTTCGCGTTACATAACTTACGGTAAATGGCCC  
GCCTGGCTGACCGCCCAACGACCCCCGCCATTGACGTCAATAATGACGTATGTTCCCAT  
AGTAACGCCAATAGGGACTTTCCATTGACGTCAATGGGTGGACTATTTACGGTAAACTG  
CCCCTTGGCAGTACATCAAGTGTATCATATGCCAAGTACGCCCCCTATTGACGTCAATG  
ACGGTAAATGGCCCGCCTGGCATTATGCCAGTACATGACCTTATGGGACTTTCCTACTT  
GGCAGTACATCTACGTATTAGTCATCGCTATTACCATGGGTGAGGTTGAGCCCCACGTTT  
TGCTTCACTCTCCCCATCTCCCCCCCCCTCCCCACCCCAATTTTGTATTTATTTATTTT  
ATTATTTTGTGCAGCGATGGGGGCGGGGGGGGGGGGGGGCGCGCGCCAGGCGGGGGCGGG  
GCGGGGCGAGGGGCGGGGGCGGGGGCGAGGCGGAGAGGTGCGGCGGCAGCCAATCAGAG

CGGCGCGCTCCGAAAGTTTCCTTTTATGGCGAGGCGGCGGCGGCGGCGGCCCTATAAAA  
AGCGAAGCGCGCGGGCGGGGAGTCGCTGCGTTGCCTTCGCCCCGTGCCCCGCTCCGC  
GCCGCTCGCGCCGCCCGCCCCGGCTCTGACTGACCGCGTTACTCCCACAGGTGAGCGG  
GCGGGACGGCCCTTCTCCTCCGGGCTGTAATTAGCGCTTGGTTTAATGACGGCTCGTTTC  
TTTTCTGTGGCTGCGTGAAAGCCTTAAAGGGCTCCGGGAGGGCCCTTTGTGCGGGGGG  
AGCGGCTCGGGGGGTGCGTGCGTGTGTGTGCGTGGGGAGCGCCGCGTGCGGCCCCGC  
CTGCCCCGGCGGCTGTGAGCGCTGCGGGCGCGGCGCGGGGCTTTGTGCGCTCCGCGTGTG  
CGCGAGGGGAGCGCGGCCGGGGGCGGTGCCCGCGGTGCGGGGGGGCTGCGAGGGGAA  
CAAAGGCTGCGTGCGGGGTGTGTGCGTGGGGGGGTGAGCAGGGGGTGTGGGCGCGGCG  
GTCGGGCTGTAACCCCCCCTGCACCCCCCTCCCCGAGTTGCTGAGCACGGCCCCGGCTTC  
GGGTGCGGGGCTCCGTACGGGGCGTGGCGCGGGGCTCGCCGTGCCGGGCGGGGGGTGG  
CGGCAGGTGGGGGTGCCGGGCGGGGCGGGGCCGCTCGGGCCGGGGAGGGCTCGGGGG  
AGGGGCGCGGCGGCCCCCGAGCGCCGGCGGCTGTGAGGGCGCGGCGAGCCGCAGCCA  
TTGCCTTTTATGGTAATCGTGCGAGAGGGCGCAGGGACTTCCTTTGTCCCAAATCTGTGC  
GGAGCCGAAATCTGGGAGGCGCCGCCGCACCCCCCTAGCGGGCGCGGGGGCGAAGCGG  
TGCGGCGCCGGCAGGAAGGAAATGGGCGGGGAGGGCCTTCGTGCGTGCCCGCGCCGCC  
GTCCCTTCTCCCTCTCCAGCCTCGGGGCTGTCCGCGGGGGGACGGCTGCCTTCGGGGGG  
GACGGGGCAGGGCGGGGTTCCGGCTTCTGGCGTGTGACCGGCGGCTCTAGAGCCTCTGCT  
AACCATGTTTCATGCCTTCTTCTTTTCTACAGCTCCTGGGCAACGTGCTGGTTGTTGTG  
TGTCTCATATTTTGGCAAAGAATTCGCCACCATGGTGAGCAAGGGCGAGGAGCTGTTC  
ACCGGCGTGGTGCCCATCCTGGTGGAGCTGGACGGCGACGTGAACGGCCACAAGTTCAG  
CGTGCGCGGCGAGGGCGAGGGCGACGCCACCAACGGCAAGCTGACCCTGAAGTTCATC  
TGCACCACCGGCAAGCTGCCCGTGCCCTGGCCACCCTGGTGACCACCCTGACCTACGG  
CGTGCAGTGCTTCAGCCGCTACCCCGACCACATGAAGCGCCACGACTTCTTCAAGAGCG  
CCATGCCCCGAGGGCTACGTGCAGGAGCGCACCATCAGCTTCAAGGACGACGGCACCTAC  
AAGACCCGCGCCGAGGTGAAGTTCGAGGGCGACACCCTGGTGAACCGCATCGAGCTGA  
AGGGCATCGACTTCAAGGAGGACGGCAACATCCTGGGCCACAAGCTGGAGTACAACCTC  
AACAGCCACTAAGTGTACATCACCGCCGACAAGCAGAAGAACGGCATCAAGGCCAACT  
TCAAGATCCGCCACAACGTGGAGGACGGCAGCGTGCAGCTGGCCGACCACTACCAGCA  
GAACACCCCCATCGGCGACGGCCCCGTGCTGCTGCCCGACAACCACTACCTGAGCACC  
AGAGCGTGCTGAGCAAGGACCCCAACGAGAAGCGCGACCACATGGTGCTGCTGGAGTT  
CGTGACCGCCCGCCGGCATCACCCACGGCATGGACGAGCTGTACAAGTGAGAATTCATC  
CTCAGGTGCAGGCTGCCTATCAGAAGGTGGTGGCTGGTGTGGCCAATGCCCTGGCTCAC  
AAATACCACTGAGATCTTTTTCCCTCTGCCAAAATTATGGGGACATCATGAAGCCCCTT  
GAGCATCTGACTTCTGGCTAATAAAGGAAATTTATTTTCATTGCAATAGTGTGTTGGAAT  
TTTTTGTGTCTCTCACTCGGAAGGACATATGGGAGGGCAAATCATTTAAAACATCAGAA  
TGAGTATTTGGTTTAGAGTTTGGCAACATATGCCATATGCTGGCTGCCATGAACAAAGGT  
GGCTATAAAGAGGTCATCAGTATATGAAACAGCCCCCTGCTGTCCATTCTTATTCCATA  
GAAAAGCCTTGACTTGAGGTTAGATTTTTTTTATATTTTGTGTTATTTTTTTCTTTA  
ACATCCCTAAAATTTTCTTACATGTTTTACTAGCCAGATTTTTTCTCCTCTCCTGACTAC  
TCCAGTCATAGCTGTCCCTTCTCTTATGAAGATCCCTCGACCTGCAGCCCAAGCT

## 2700 bp DNA sequence – pUC18 linearised with HindIII digestion:

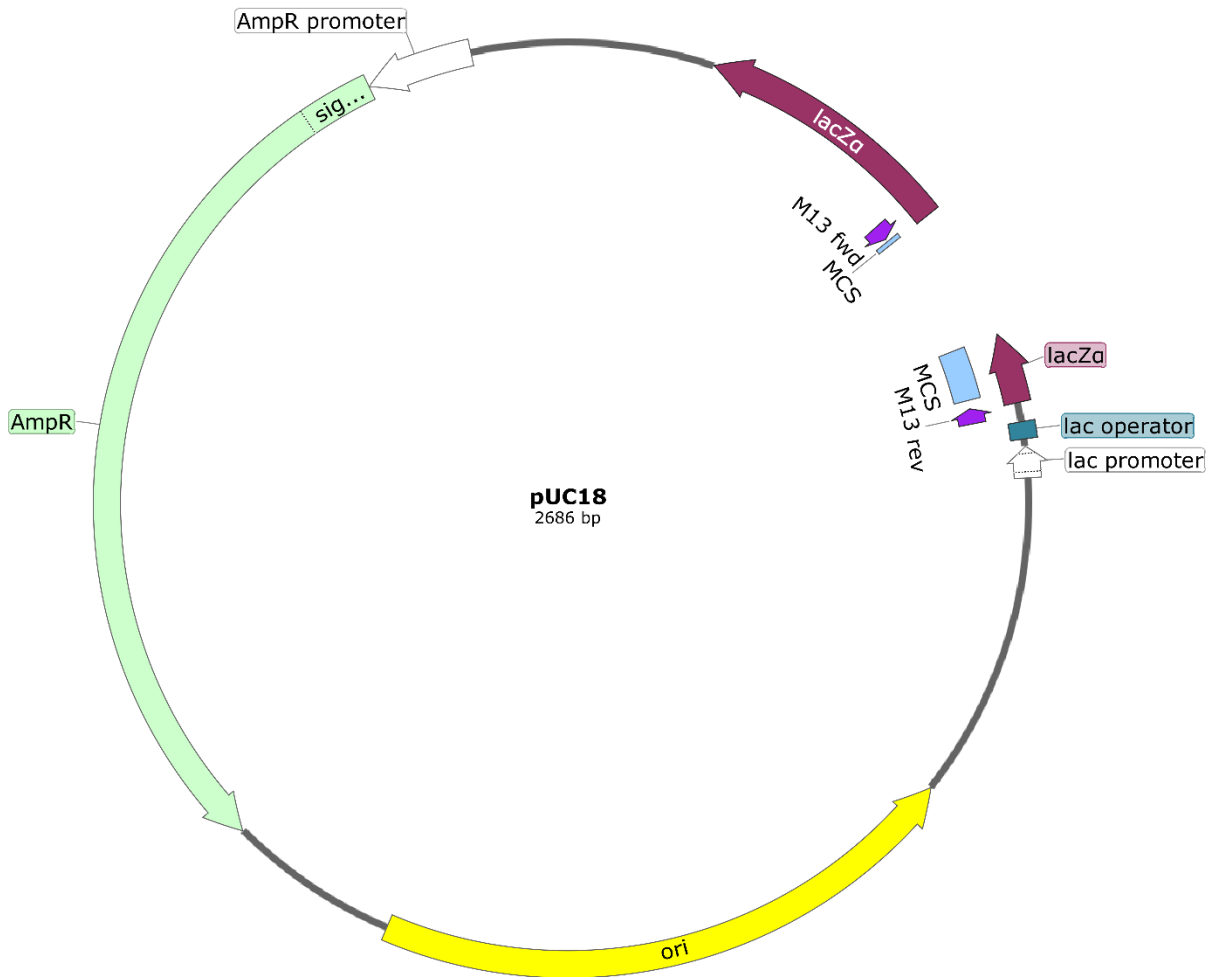

**AGCT**TGCATGCCTGCAGGTCGACTCTAGAGGATCCCCGGGTACCGAGCTCGAATTCGTA  
 ATCATGGTCATAGCTGTTTCCTGTGTGAAATTGTTATCCGCTCACAATTCCACACAACAT  
 ACGAGCCGGAAGCATAAAGTGTAAGCCTGGGGTGCCTAATGAGTGAGCTAACTCACAT  
 TAATTGCGTTGCGCTCACTGCCCGCTTTCCAGTCGGGAAACCTGTCGTGCCAGCTGCATT  
 AATGAATCGGCCAACGCGCGGGGAGAGGCGGTTTGCGTATTGGGCGCTCTTCCGCTTCC  
 TCGCTCACTGACTCGCTGCGCTCGGTCGTTCCGGCTGCGGCGAGCGGTATCAGCTCACTCA  
 AAGGCGGTAATACGGTTATCCACAGAATCAGGGGATAACGCAGGAAAGAACATGTGAG  
 CAAAAGGCCAGCAAAGGCCAGGAACCGTAAAAAGGCCGCGTTGCTGGCGTTTTTCCAT  
 AGGCTCCGCCCCCTGACGAGCATCACAAAATCGACGCTCAAGTCAGAGGTGGCGAA  
 ACCCGACAGGACTATAAAGATACCAGGCGTTTCCCCCTGGAAGCTCCCTCGTGCGCTCT  
 CCTGTTCCGACCCTGCCGCTTACCGGATACCTGTCCGCCTTCTCCCTTCGGGAAGCGTG  
 GCGCTTCTCATAGCTCACGCTGTAGGTATCTCAGTTCGGTGTAGGTGCTTCGCTCCAAG  
 CTGGGCTGTGTGCACGAACCCCCGTTTCAGCCCGACCGCTGCGCCTTATCCGGTAACTAT  
 CGTCTTGAGTCCAACCCGGTAAGACACGACTTATCGCCACTGGCAGCAGCCACTGGTAA  
 CAGGATTAGCAGAGCGAGGTATGTAGGCGGTGCTACAGAGTTCTTGAAGTGGTGGCCTA  
 ACTACGGCTACACTAGAAGGACAGTATTTGGTATCTGCGCTCTGCTGAAGCCAGTTACCT

TCGGAAAAAGAGTTGGTAGCTCTTGATCCGGCAAACAAACCACCGCTGGTAGCGGTGGT  
TTTTTTGTTTGCAAGCAGCAGATTACGCGCAGAAAAAAGGATCTCAAGAAGATCCTTT  
GATCTTTTCTACGGGGTCTGACGCTCAGTGGAACGAAAACCTCACGTAAAGGGATTTTGGT  
CATGAGATTATCAAAAAGGATCTTCACCTAGATCCTTTTAAATTA AAAATGAAGTTTTAA  
ATCAATCTAAAGTATATATGAGTAAACTTGGTCTGACAGTTACCAATGCTTAATCAGTGA  
GGCACCTATCTCAGCGATCTGTCTATTTTCGTTTCATCCATAGTTGCCTGACTCCCCGTCGTG  
TAGATAACTACGATACGGGAGGGCTTACCATCTGGCCCCAGTGCTGCAATGATACCGCG  
AGACCCACGCTCACCGGCTCCAGATTTATCAGCAATAAACCAGCCAGCCGGAAGGGCCG  
AGCGCAGAAGTGGTCTGCAACTTTATCCGCCTCCATCCAGTCTATTAATTGTTGCCGGG  
AAGCTAGAGTAAGTAGTTCGCCAGTTAATAGTTTGCGCAACGTTGTTGCCATTGCTACAG  
GCATCGTGGTGTACGCTCGTCTGTTGGTATGGCTTCATTCAGCTCCGGTTC CCAACGAT  
CAAGGCGAGTTACATGATCCCCATGTTGTGCAAAAAGCGGTTAGCTCCTTCGGTCTCTC  
CGATCGTTGTCAGAAAGTAAGTTGGCCGCAGTGTTATCACTCATGGTTATGGCAGCACTGC  
ATAATTCTCTTACTGTCATGCCATCCGTAAGATGCTTTTCTGTGACTGGTGAGTACTCAA  
CCAAGTCATTCTGAGAATAGTGTATGCGGGCAGCCGAGTTGCTCTTGCCCGGCGTCAATA  
CGGGATAATACCGCGCCACATAGCAGAACTTTAAAAGTGCTCATCATTGGAAAACGTTCC  
TTCGGGGCGAAAACCTCTCAAGGATCTTACCGCTGTTGAGATCCAGTTCGATGTAACCCA  
CTCGTGCACCCA ACTGATCTTCAGCATCTTTTACTTTACCAGCGTTTCTGGGTGAGCAA  
AAACAGGAAGGCAAAAATGCCGCAAAAAGGGAATAAGGGCGACACGGAAATGTTGAA  
TACTCATACTCTTCTTTTCAATATTATTGAAGCATTATCAGGGTTATTGTCTCATGAG  
CGGATACATATTTGAATGTATTTAGAAAAATAAACA AATAGGGGTTCCGCGCACATTTCC  
CCCGAAAAGTGCCACCTGACGTCTAAGAAACCATTATTATCATGACATTAACCTATAAAA  
AATAGGCGTATCACGAGGCCCTTTCGTCTCGCGCGTTTCGGTGATGACGGTGAAAACCT  
CTGACACATGCAGCTCCCGGAGACGGTCAAGCTTGTCTGTAAGCGGATGCCGGGAGCA  
GACAAGCCCGTCAGGGCGCGTCAGCGGGTGTGGCGGGTGTGCGGGCTGGCTTAACTAT  
GCGGCATCAGAGCAGATTGTACTGAGAGTGCACCATATGCGGTGTGAAATACCGCACAG  
ATGCGTAAGGAGAAAATACCGCATCAGGCGCCATTCCGCATTCAGGCTGCGCAACTGTT  
GGGAAGGGCGATCGGTGCGGGCCTCTTCGCTATTACGCCAGCTGGCGAAAGGGGGATGT  
GCTGCAAGGCGATTAAGTTGGGTAACGCCAGGGTTTTCCAGTCACGACGTTGTAAAAC  
GACGGCCAGTGCCAAGCT

**1300 bp PCR fragment – PCR of gene encoding maltose binding protein:**

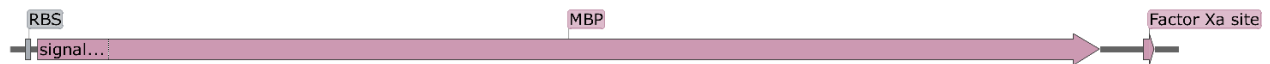

TTTTGTTTAACTTTAAGAAGGAGATATACATATGAAAATAAAAACAGGTGCACGCATCC  
TCGCATTATCCGCATTAACGACGATGATGTTTTCCGCCTCGGCTCTCGCCAAAATCGAAG  
AAGGTAAACTGGTAATCTGGATTAACGGCGATAAAGGCTATAACGGTCTCGCTGAAGTC  
GGTAAGAAATTCGAGAAAGATACCGGAATTAAGTACACCGTTGAGCATCCGGATAAACT  
GGAAGAGAAATTTCCACAGGTTGCGGCAACTGGCGATGGCCCTGACATTATCTTCTGGG  
CACACGACCGCTTTGGTGGCTACGCTCAATCTGGCCTGTTGGCTGAAATCACCCCGGAC  
AAAGCGTTCAGGACAAGCTGTATCCGTTTACCTGGGATGCCGTACGTTACAACGGCAA  
GCTGATTGCTTACCCGATCGCTGTTGAAGCGTTATCGCTGATTATAACAAGATCTGCT  
GCCGAACCCGCCAAAACCTGGGAAGAGATCCCGGCGCTGGATAAAGA ACTGAAAGCG

AAAGGTAAGAGCGCGCTGATGTTCAACCTGCAAGAACCGTACTTCACCTGGCCGCTGAT  
TGCTGCTGACGGGGTTATGCGTTCAAGTATGAAAACGGCAAGTACGACATTAAAGACG  
TGGGCGTGGATAACGCTGGCGCGAAAGCGGGTCTGACCTTCCTGGTTGACCTGATTA  
AACAAACACATGAATGCAGACACCGATTACTCCATCGCAGAAGCTGCCTTTAATAAAGG  
CGAAACAGCGATGACCATCAACGGCCCGTGGGCATGGTCCAACATCGACACCAGCAA  
GTGAATTATGGTGTAAACGGTACTGCCGACCTTCAAGGGTCAACCATCCAAACCGTTCGTT  
GGCGTGCTGAGCGCAGGTATTAACGCCGCCAGTCCGAACAAAGAGCTGGCAAAGAGT  
TCCTCGAAAACCTATCTGCTGACTGATGAAGGTCTGGAAGCGGTTAATAAAGACAAACCG  
CTGGGTGCCGTAGCGCTGAAGTCTTACGAGGAAGAGTTGGTGAAAGATCCGCGTATTGC  
CGCCACTATGGAAAACGCCCAGAAAGGTGAAATCATGCCGAACATCCCGCAGATGTCCG  
CTTTCTGGTATGCCGTGCGTACTGCGGTGATCAACGCCGCCAGCGGTCGTCAGACTGTCCG  
ATGAAGCCCTGAAAGACGCGCAGACTAATTCGAGCTCGAACAACAACAATAACAA  
TAACAACAACCTCGGGATCGAGGGAAGGGCTAGCGAGAATCTTTATTTTCAGG

## 2 Supplementary Figures and Tables

### 2.1 Supplementary Figures

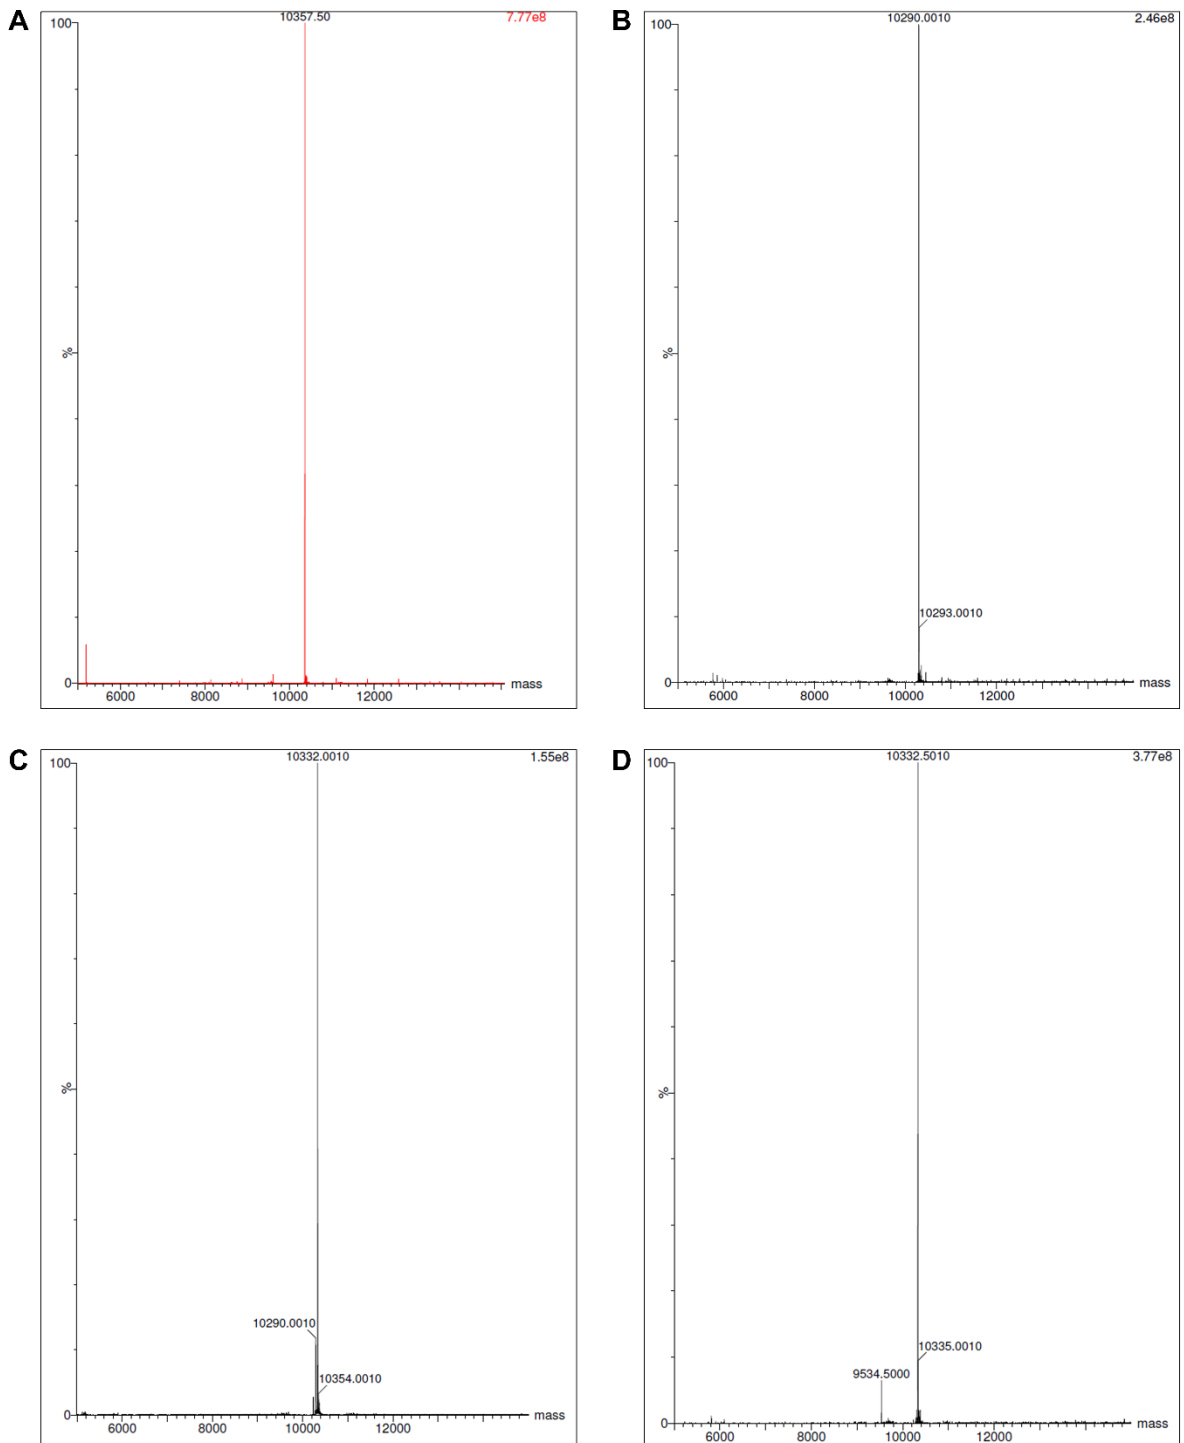

**Supplementary Figure 1.** Mass spectrometry analysis of purified proteins from **Figure 2** of the main manuscript. Mass spectrometry analysis of purified (A) HU $\alpha$ , (B) HU $\beta$ , (C) HU $\beta$ (K67ac) and (D) HU $\beta$ (K86ac).

**A** Acetylation of HU $\beta_2$  homodimer on interaction with a 30 bp DNA fragment containing a 2-nt gap

**B** Acetylation of HU $\alpha\beta$  heterodimer on interaction with a 30 bp DNA fragment containing a 2-nt gap

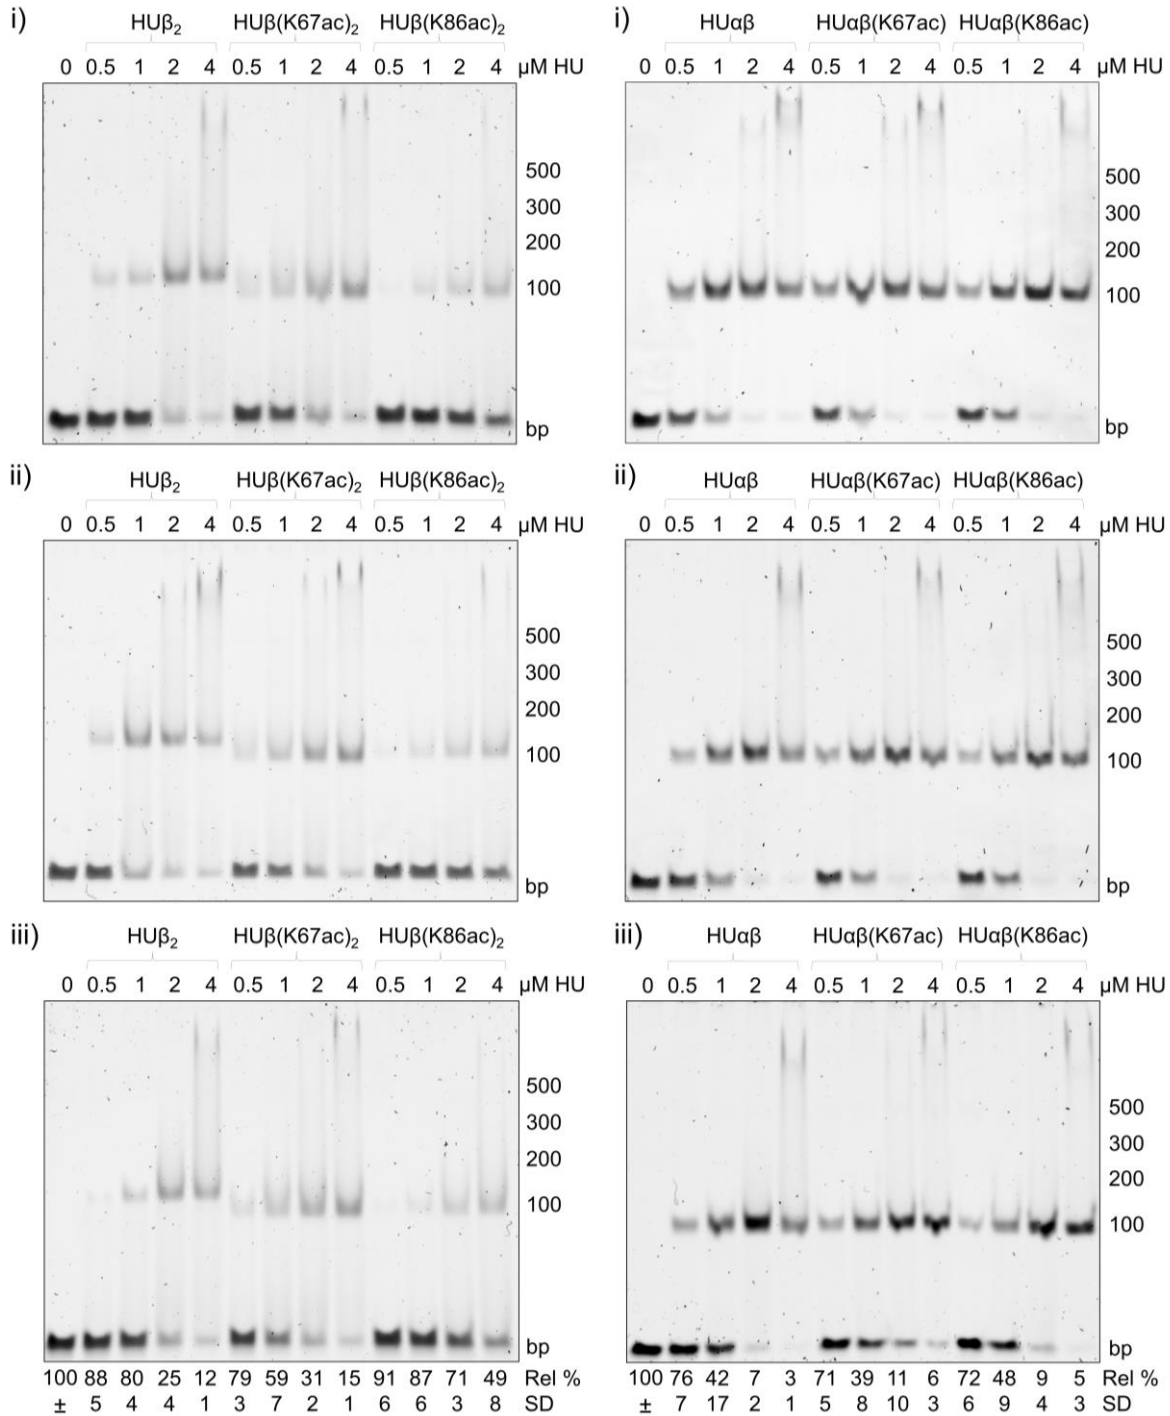

**Supplementary Figure 2.** Effect of acetylation of K67ac and K86ac on interaction with 30-bp DNA containing 2-nucleotide gap. EMSA of *E. coli* HU $\beta_2$  (**A**) or HU $\alpha\beta$  (**B**) with 30-bp DNA containing a 2-nt gap (shown in **Figure 3A**). Free DNA remaining in HU-containing conditions was calculated relative to the band intensity of the DNA-only lane (= 100%). Average free DNA remaining (Rel %) and standard deviation (SD) are presented below three independent repeats (i, ii, and iii).



### A 2-nt gap repeats

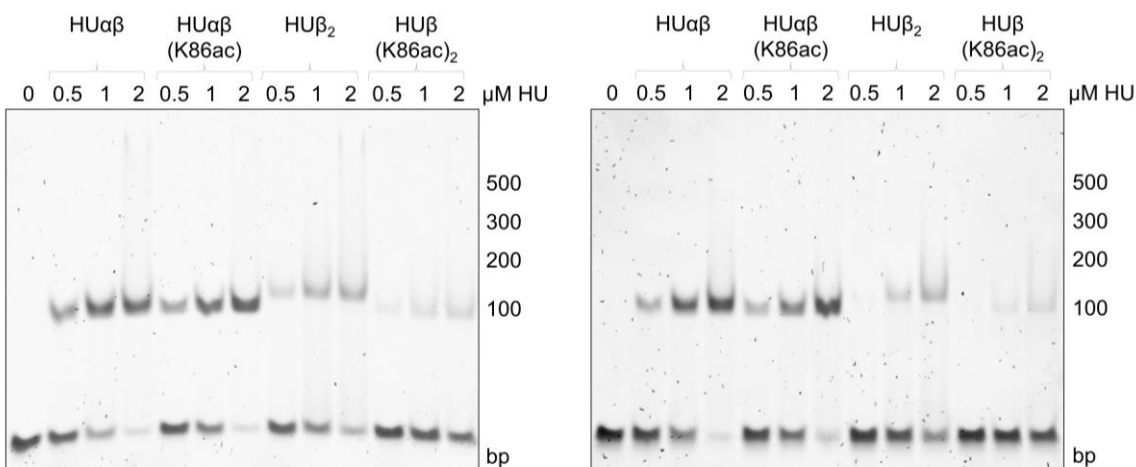

### B Nicked backbone repeats

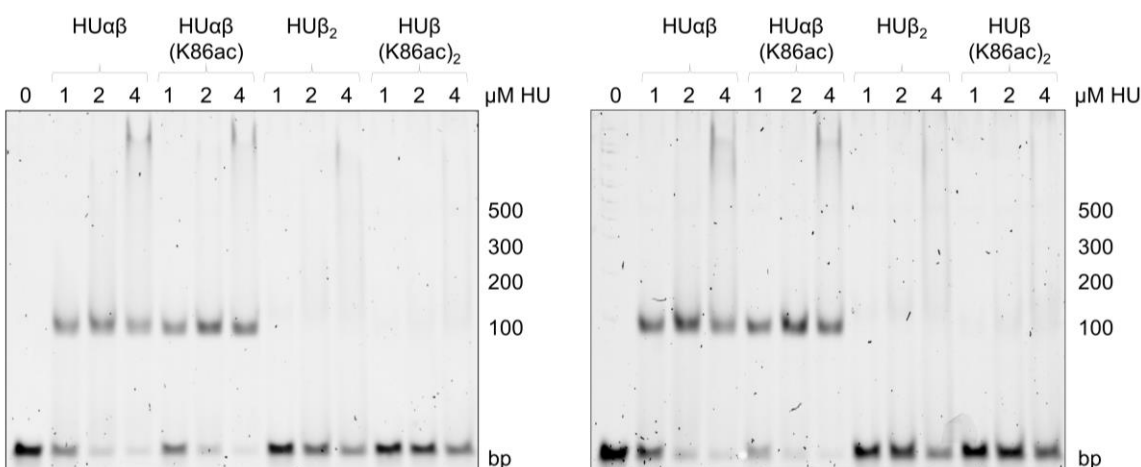

### C Whole duplex repeats

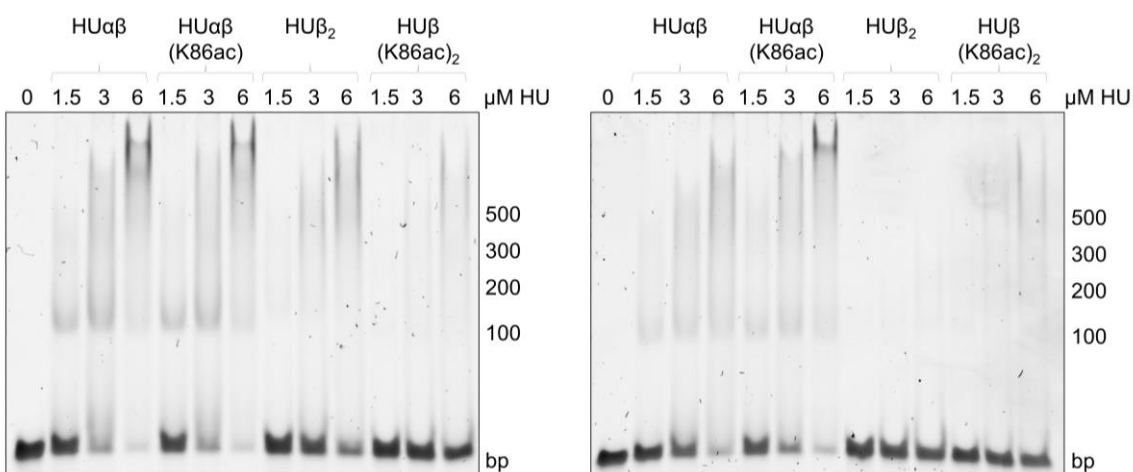

**Supplementary Figure 3.** Repeats of EMSAs from **Figure 4** of the main manuscript. **(A)** EMSA comparing the effect of acetylation on the HUβ<sub>2</sub> homodimer vs the HUαβ heterodimer when interacting with a 30 bp DNA fragment containing a 2-nucleotide gap. Repeats of the representative

figure in panel **A** of **Figure 4** of the main manuscript. **(B)** EMSA comparing the effect of acetylation on the HU $\beta_2$  homodimer vs the HU $\alpha\beta$  heterodimer when interacting with a 30 bp with a nicked phosphate backbone. Repeats of the representative figure in panel **B** of **Figure 4** of the main manuscript. **(C)** EMSA comparing the effect of acetylation on the HU $\beta_2$  homodimer vs the HU $\alpha\beta$  heterodimer when interacting with a 30 bp DNA fragment with a complete double-stranded duplex. Repeats of the representative figure in panel **C** of **Figure 4** of the main manuscript.

**A** Alternative 30 bp fully complementary DNA fragment

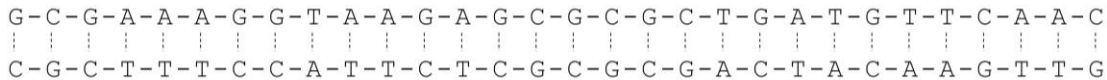

**B** EMSA with alternative 30 bp fully complementary DNA fragment

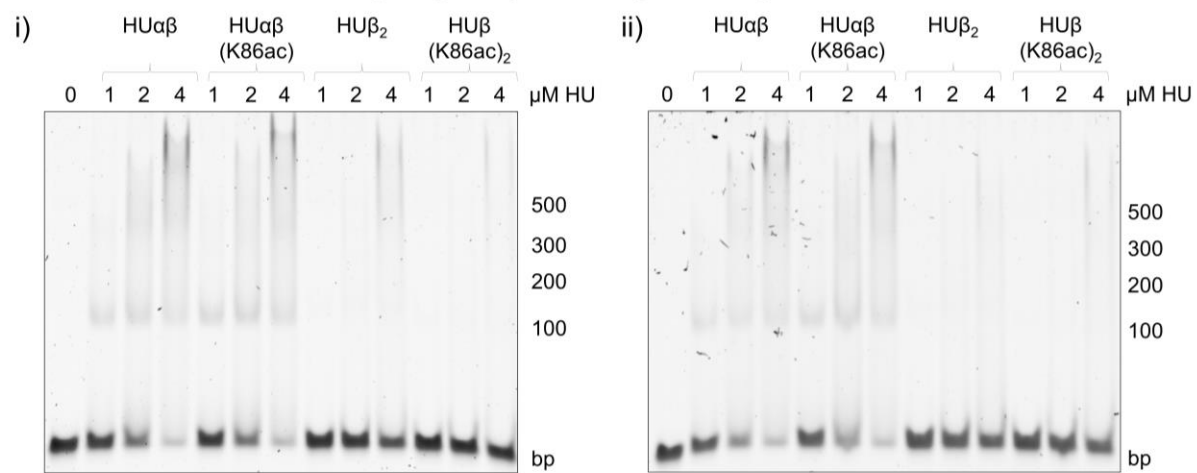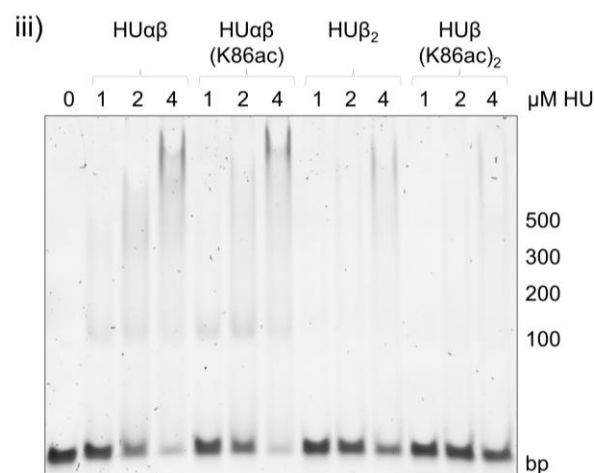

**C** EMSA with 420 bp DNA fragment

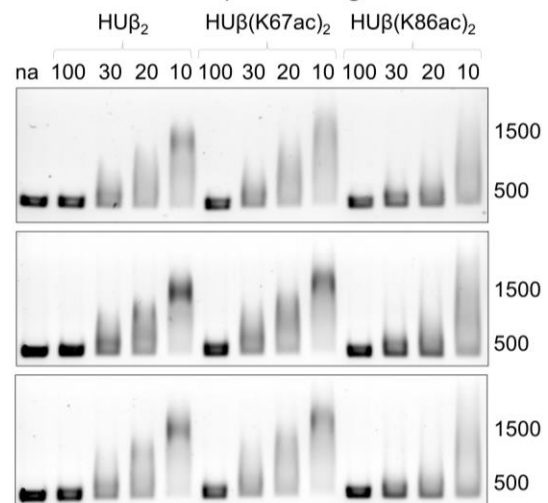

**Supplementary Figure 4.** EMSA with alternative 30 bp fully complementary DNA fragment and 420 bp DNA fragment. **(A)** Sequence of alternative fully complementary 30 bp DNA fragment. The phosphate backbone is indicated by a solid line and hydrogen bonds between base pairs are indicated by dashed lines. **(B)** EMSA comparing acetylation of Lys86 of HU $\beta_2$  homodimer vs the HU $\alpha\beta$

heterodimer when interacting with an alternative 30 bp DNA fragment. Three repeats (i, ii and iii) are shown. (C) EMSA comparing acetylation of HU $\beta_2$  when interacting with a 420 bp DNA fragment.

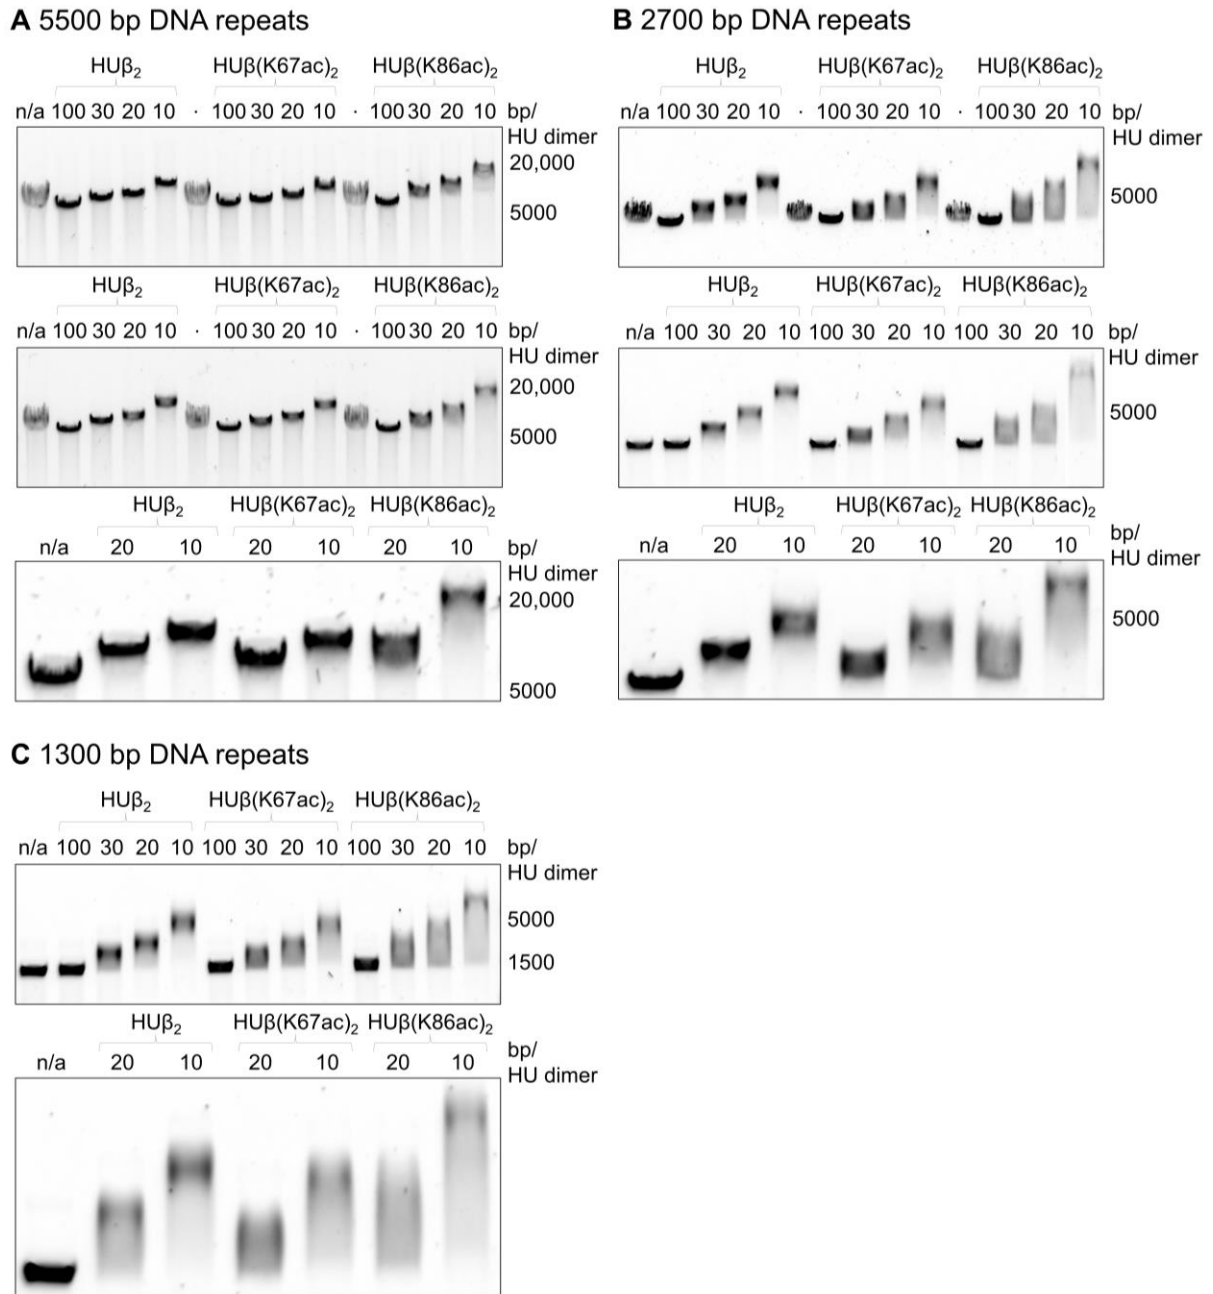

**Supplementary Figure 5.** Repeats of EMSAs from **Figure 4** of the main manuscript. (A) EMSA investigating the effect of acetylation of the HU $\beta_2$  homodimer on interaction with a 5500 bp linear DNA fragment. Repeats of the representative figure in **Figure 4D i)** of the main manuscript. (B) EMSA investigating the effect of acetylation of the HU $\beta_2$  homodimer on interaction with a 2700 bp linear DNA fragment. Repeats of the representative figure in **Figure 4D ii)** of the main manuscript.

(C) EMSA investigating the effect of acetylation of the HU $\beta_2$  homodimer on interaction with a 1300 bp linear DNA fragment. Repeats of the representative figure in **Figure 4D iii)** of the main manuscript.

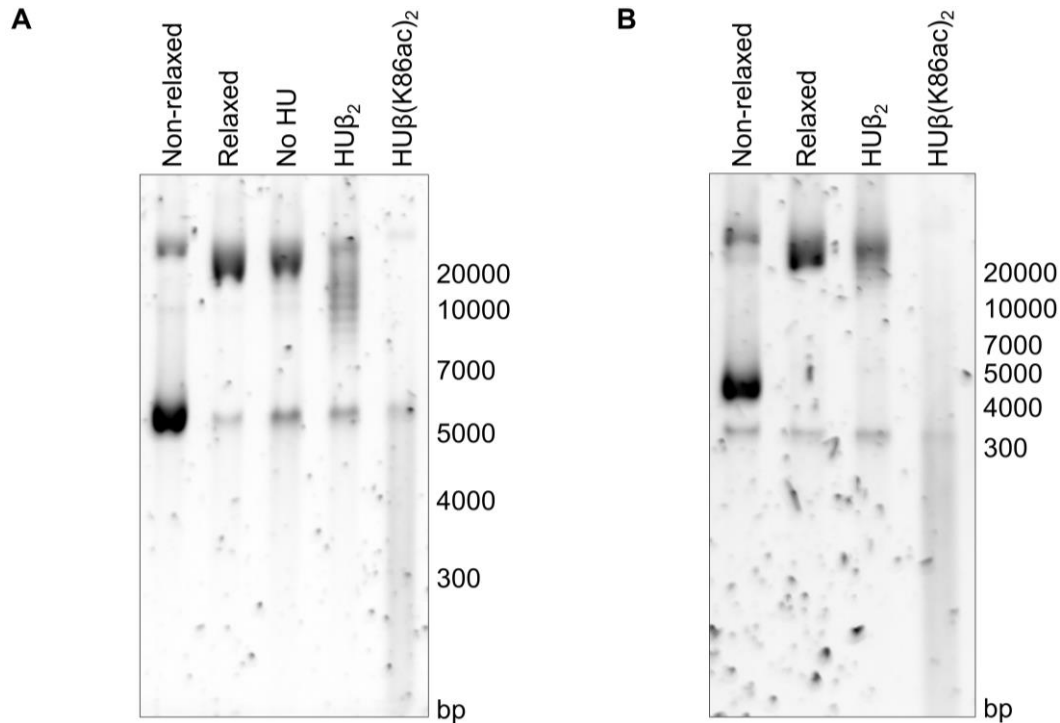

**Supplementary Figure 6.** Effect of acetylation at Lys86 on DNA supercoiling ability of HU $\beta_2$  in the presence of topoisomerase I. Two repeats, **A** and **B**, are shown. A miniprepmed 5500 bp plasmid (non-relaxed) was relaxed with *E. coli* topoisomerase I then purified (relaxed). The relaxed DNA was then incubated with HU $\beta_2$ , or HU $\beta$ (K86ac) $_2$  in the presence of calf thymus topoisomerase I. The samples were treated with proteinase K before electrophoresis.

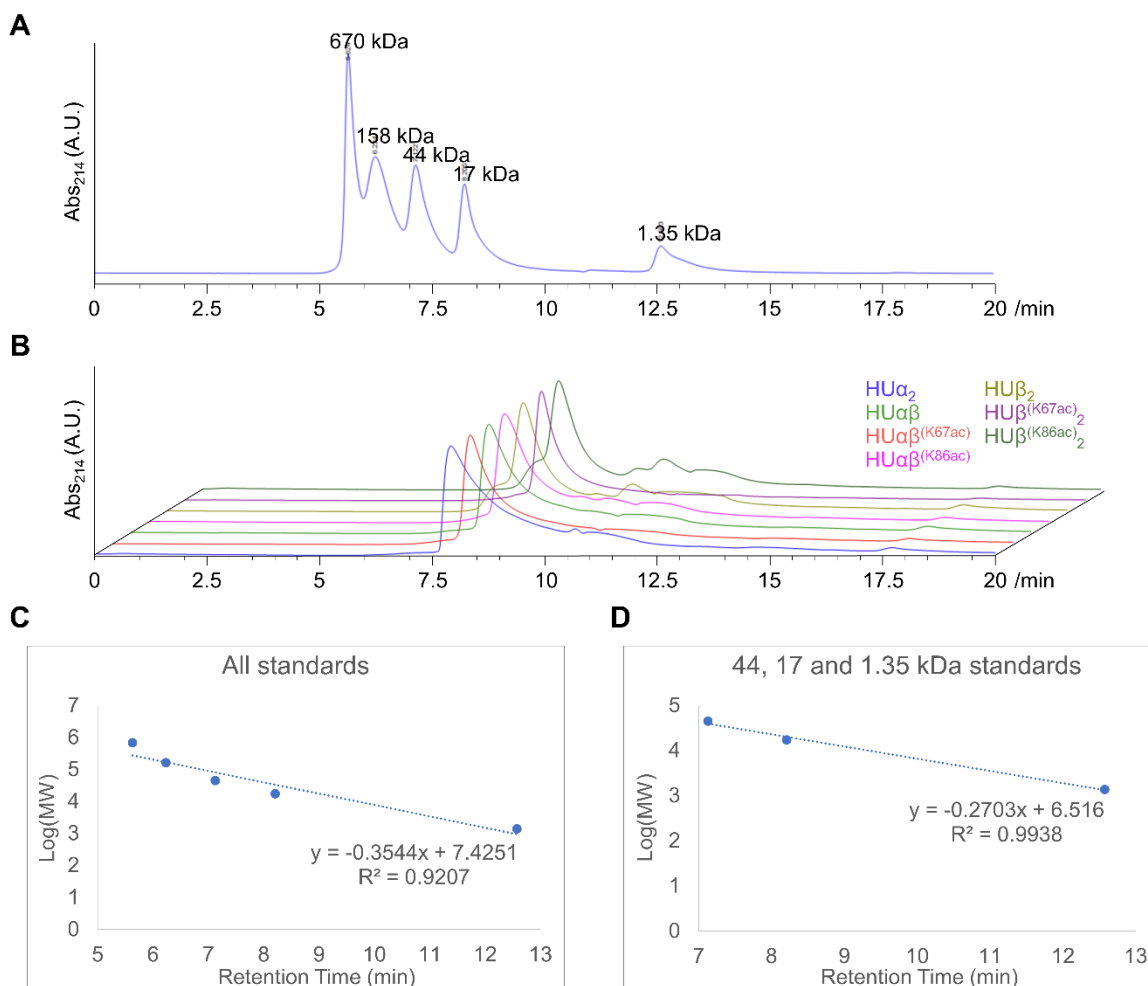

**Supplementary Figure 7.** Analytical size exclusion high-performance liquid chromatography. **(A)** Analytical size exclusion chromatography of Bio-Rad Gel Filtration standards. The absorbance at 214 nm is plotted against the retention time of each of the five protein standards. The known molecular weights of the standards are 670, 158, 44, 17 and 1.35 kDa. **(B)** Analytical size exclusion chromatography of HU proteins. The absorbance at 214 nm is plotted against the retention time. **(C)** A standard curve generated from the retention times of the 5 protein standards in A and the log of their molecular weights. **(D)** A standard curve generated from the retention times of the 44, 17 and 1.35 kDa standards and the log of their molecular weights. For estimated molecular weight calculations, please see **Supplementary Tables 7 - 9**.

## 2.2 Supplementary Tables

**Supplementary Table 1.** Calculations of free DNA remaining for EMSAs of HU $\beta_2$  homodimers incubated with a 30 bp DNA fragment containing a 2-nucleotide gap. Average and standard deviation were calculated for three independent repeats. A single outlier was omitted from the calculations and is annotated in red.

|                    | HU $\beta_2$ |     |     |     | HU $\beta$ (K67ac) $_2$ |     |     |     | HU $\beta$ (K86ac) $_2$ |     |     |     |
|--------------------|--------------|-----|-----|-----|-------------------------|-----|-----|-----|-------------------------|-----|-----|-----|
| $\mu$ M HU         | 0.5          | 1   | 2   | 4   | 0.5                     | 1   | 2   | 4   | 0.5                     | 1   | 2   | 4   |
| Repeat 1           | 84           | 37  | 21  | 12  | 77                      | 59  | 32  | 15  | 86                      | 87  | 74  | 57  |
| Repeat 2           | 93           | 82  | 29  | 11  | 83                      | 52  | 28  | 14  | 97                      | 93  | 69  | 41  |
| Repeat 3           | 87           | 77  | 24  | 12  | 78                      | 65  | 32  | 15  | 89                      | 81  | 70  | 49  |
| Average            | 88           | 80  | 25  | 12  | 79                      | 59  | 31  | 15  | 91                      | 87  | 71  | 49  |
| Standard Deviation | 4.6          | 3.5 | 4.0 | 0.6 | 3.2                     | 6.5 | 2.3 | 0.6 | 5.7                     | 6.0 | 2.7 | 8.0 |

**Supplementary Table 2.** Calculations of free DNA remaining for EMSAs of HU $\alpha\beta$  heterodimers incubated with a 30 bp DNA fragment containing a 2-nucleotide gap. Average and standard deviation were calculated for three independent repeats.

|                    | HU $\alpha\beta$ |      |     |     | HU $\alpha\beta$ (K67ac) |     |      |     | HU $\alpha\beta$ (K86ac) |     |     |     |
|--------------------|------------------|------|-----|-----|--------------------------|-----|------|-----|--------------------------|-----|-----|-----|
| $\mu$ M HU         | 0.5              | 1    | 2   | 4   | 0.5                      | 1   | 2    | 4   | 0.5                      | 1   | 2   | 4   |
| Repeat 1           | 69               | 27   | 5   | 4   | 68                       | 35  | 5    | 4   | 70                       | 45  | 10  | 8   |
| Repeat 2           | 78               | 39   | 7   | 2   | 68                       | 35  | 5    | 4   | 68                       | 41  | 5   | 5   |
| Repeat 3           | 82               | 61   | 9   | 2   | 77                       | 48  | 23   | 9   | 79                       | 58  | 12  | 2   |
| Average            | 76               | 42   | 7   | 3   | 71                       | 39  | 11   | 6   | 72                       | 48  | 9   | 5   |
| Standard Deviation | 6.7              | 17.2 | 2.0 | 1.2 | 5.2                      | 7.5 | 10.4 | 2.9 | 5.9                      | 8.9 | 3.6 | 3.0 |

**Supplementary Table 3.** Calculations of free DNA remaining for EMSAs comparing the effects of acetylation on HU $\beta_2$  homodimers vs HU $\alpha\beta$  heterodimers incubated with a 30 bp DNA fragment containing a 2-nucleotide gap. Average and standard deviation were calculated for three independent repeats.

|                    | HU $\alpha\beta$ |      |     | HU $\alpha\beta$ (K86ac) |     |     | HU $\beta_2$ |      |      | HU $\beta$ (K86ac) $_2$ |     |     |
|--------------------|------------------|------|-----|--------------------------|-----|-----|--------------|------|------|-------------------------|-----|-----|
| $\mu$ M HU         | 0.5              | 1    | 2   | 0.5                      | 1   | 2   | 0.5          | 1    | 2    | 0.5                     | 1   | 2   |
| Repeat 1           | 72               | 36   | 9   | 77                       | 52  | 9   | 74           | 52   | 27   | 89                      | 85  | 60  |
| Repeat 2           | 64               | 26   | 4   | 71                       | 42  | 3   | 66           | 48   | 20   | 75                      | 76  | 67  |
| Repeat 3           | 83               | 51   | 8   | 80                       | 56  | 15  | 92           | 75   | 42   | 94                      | 84  | 72  |
| Average            | 73               | 38   | 7   | 76                       | 50  | 9   | 77           | 58   | 30   | 86                      | 82  | 66  |
| Standard Deviation | 9.5              | 12.6 | 2.7 | 4.6                      | 7.2 | 6.0 | 13.3         | 14.6 | 11.2 | 9.6                     | 4.9 | 6.0 |

**Supplementary Table 4.** Calculations of free DNA remaining for EMSAs comparing the effects of acetylation on HU $\beta_2$  homodimers vs HU $\alpha\beta$  heterodimers incubated with a 30 bp DNA fragment with a nicked phosphate backbone. Average and standard deviation were calculated for three independent repeats.

|                    | HU $\alpha\beta$ |     |     | HU $\alpha\beta$ (K86ac) |     |     | HU $\beta_2$ |     |     | HU $\beta$ (K86ac) $_2$ |      |     |
|--------------------|------------------|-----|-----|--------------------------|-----|-----|--------------|-----|-----|-------------------------|------|-----|
| $\mu$ M HU         | 1                | 2   | 4   | 1                        | 2   | 4   | 1            | 2   | 4   | 1                       | 2    | 4   |
| Repeat 1           | 45               | 11  | 6   | 16                       | 4   | 3   | 60           | 57  | 27  | 69                      | 62   | 46  |
| Repeat 2           | 52               | 13  | 9   | 54                       | 9   | 5   | 98           | 65  | 35  | 102                     | 91   | 71  |
| Repeat 3           | 42               | 13  | 8   | 44                       | 15  | 6   | 79           | 58  | 37  | 81                      | 68   | 48  |
| Average            | 46               | 12  | 8   | 38                       | 9   | 5   | 79           | 60  | 36  | 84                      | 74   | 47  |
| Standard Deviation | 5.1              | 1.2 | 1.5 | 19.7                     | 5.5 | 1.5 | 19.0         | 4.4 | 1.4 | 16.7                    | 15.3 | 1.4 |

**Supplementary Table 5.** Calculations of free DNA remaining for EMSAs comparing the effects of acetylation on HU $\beta_2$  homodimers vs HU $\alpha\beta$  heterodimers incubated with a 30 bp fully complementary DNA fragment. Average and standard deviation were calculated for three independent repeats.

|                    | HU $\alpha\beta$ |      |     | HU $\alpha\beta$ (K86ac) |     |     | HU $\beta_2$ |      |      | HU $\beta$ (K86ac) $_2$ |     |     |
|--------------------|------------------|------|-----|--------------------------|-----|-----|--------------|------|------|-------------------------|-----|-----|
| $\mu$ M HU         | 1.5              | 3    | 6   | 1.5                      | 3   | 6   | 1.5          | 3    | 6    | 1.5                     | 3   | 6   |
| Repeat 1           | 84               | 37   | 14  | 76                       | 36  | 11  | 90           | 68   | 51   | 82                      | 86  | 70  |
| Repeat 2           | 83               | 50   | 7   | 79                       | 50  | 10  | 94           | 77   | 45   | 89                      | 86  | 73  |
| Repeat 3           | 89               | 76   | 21  | 81                       | 42  | 14  | 100          | 89   | 80   | 78                      | 73  | 67  |
| Average            | 85               | 54   | 14  | 79                       | 43  | 12  | 95           | 78   | 59   | 83                      | 82  | 70  |
| Standard Deviation | 3.2              | 19.9 | 7.0 | 2.5                      | 7.0 | 2.1 | 5.0          | 10.5 | 18.7 | 5.6                     | 7.5 | 3.0 |

**Supplementary Table 6.** Calculations of free DNA remaining for EMSAs comparing the effects of acetylation on HU $\beta_2$  homodimers vs HU $\alpha\beta$  heterodimers incubated with an alternative 30 bp fully complementary DNA fragment. Average and standard deviation were calculated for three independent repeats.

|                    | HU $\alpha\beta$ |    |    | HU $\alpha\beta$ (K86ac) |    |    | HU $\beta_2$ |    |    | HU $\beta$ (K86ac) $_2$ |    |    |
|--------------------|------------------|----|----|--------------------------|----|----|--------------|----|----|-------------------------|----|----|
| $\mu$ M HU         | 1                | 2  | 4  | 1                        | 2  | 4  | 1            | 2  | 4  | 1                       | 2  | 4  |
| Repeat 1           | 88               | 59 | 17 | 85                       | 61 | 15 | 85           | 75 | 48 | 82                      | 88 | 75 |
| Repeat 2           | 82               | 43 | 20 | 94                       | 55 | 19 | 100          | 99 | 81 | 100                     | 96 | 79 |
| Repeat 3           | 92               | 64 | 15 | 93                       | 60 | 22 | 100          | 98 | 74 | 100                     | 98 | 91 |
| Average            | 87               | 55 | 17 | 91                       | 59 | 19 | 95           | 91 | 68 | 94                      | 94 | 82 |
| Standard Deviation | 5                | 11 | 3  | 5                        | 3  | 4  | 9            | 14 | 17 | 10                      | 5  | 8  |



**Supplementary Table 7.** Retention times of Bio-Rad Gel Filtration Standards. The retention times of three repeats are provided alongside the known molecular weights of the proteins. The log of the molecular weights were plotted against the average retention times to generate a calibration curve (**Supplementary Figure 7A and B**).

|               | Retention Time (min) |        |        |         | MW (Da) | Log(MW) |
|---------------|----------------------|--------|--------|---------|---------|---------|
|               | 1                    | 2      | 3      | Average |         |         |
| Thyroglobulin | 5.636                | 5.626  | 5.624  | 5.629   | 670000  | 5.826   |
| y-globulin    | 6.242                | 6.232  | 6.224  | 6.233   | 158000  | 5.199   |
| Ovalbumin     | 7.135                | 7.125  | 7.122  | 7.127   | 44000   | 4.643   |
| Myoglobin     | 8.215                | 8.209  | 8.205  | 8.210   | 17000   | 4.230   |
| Vitamin B12   | 12.595               | 12.573 | 12.563 | 12.577  | 1350    | 3.130   |

**Supplementary Table 8.** Verifying standard curve molecular weight estimations. The line of best fits generated in the calibration curves (**Supplementary Figure 7A and B**) were used to calculate the molecular weights of the protein standards based on their retention times. This calculated value was compared to the known molecular weight of the standards. Equation 2 provides more accurate estimations of molecular weight at lower molecular weight ranges (**1350 – 44000 Da**) and was used for further analyses as the estimated molecular weights of HU protein dimers are within this range (*ca.* 24000 Da).

|               | MW (Da) | Log(MW) | Average RT (min) | Equation 1 |         | Equation 2 |         |
|---------------|---------|---------|------------------|------------|---------|------------|---------|
|               |         |         |                  | Log(MW)    | MW (Da) | Log(MW)    | MW (Da) |
| Thyroglobulin | 670000  | 5.826   | 5.629            | 5.430      | 269340  | 4.995      | 98758   |
| y-globulin    | 158000  | 5.199   | 6.233            | 5.216      | 164529  | 4.831      | 67813   |
| Ovalbumin     | 44000   | 4.643   | 7.127            | 4.899      | 79282   | 4.589      | 38858   |
| Myoglobin     | 17000   | 4.230   | 8.210            | 4.516      | 32779   | 4.297      | 19812   |
| Vitamin B12   | 1350    | 3.130   | 12.577           | 2.968      | 929     | 3.116      | 1307    |

**Supplementary Table 9.** Molecular weight estimations of HU proteins based on their retention times in analytical size exclusion chromatography. A standard curve based on the retention times of protein standards of known molecular weights (**Supplementary Figure 7D, Supplementary Tables 7-8**) was used to estimate the molecular weight of HU proteins. The estimations suggest that the HU proteins exist in their dimeric forms.

|                            | RT (min) | Log (MW) | Calculated MW (Da) | Expected dimer MW | Expected monomer MW |
|----------------------------|----------|----------|--------------------|-------------------|---------------------|
| HU $\alpha_2$              | 7.908    | 4.378    | 23904              | 20716             | 10358               |
| HU $\alpha\beta$           | 7.952    | 4.367    | 23258              | 20649             | 10358+10291         |
| HU $\alpha\beta^{(K67ac)}$ | 7.94     | 4.370    | 23432              | 20691             | 10358+10333         |
| HU $\alpha\beta^{(K86ac)}$ | 7.902    | 4.380    | 23993              | 20691             | 10358+10333         |
| HU $\beta_2$               | 7.915    | 4.377    | 23800              | 20582             | 10291               |
| HU $\beta_2^{(K67ac)}$     | 7.916    | 4.376    | 23785              | 20666             | 10333               |
| HU $\beta_2^{(K86ac)}$     | 7.901    | 4.380    | 24008              | 20666             | 10333               |
